# Supplementary material
Source: MDPI journal article supplement (https://www.mdpi.com/2071-1050/14/19/12368)
Supplement: s1 [file s1]

**Table S1.** Localized climate trends mentioned by rural local municipalities in Limpopo Province

| Local Municipality | MAIN LOCAL CLIMATIC TRENDS |           |                       |                  |                    |                       |           |          |           |              |
|--------------------|----------------------------|-----------|-----------------------|------------------|--------------------|-----------------------|-----------|----------|-----------|--------------|
|                    | Rising temperature         | Heatwaves | More intense rainfall | Erratic rainfall | Declining rainfall | Increasing dry spells | Heatwaves | Cyclones | Hailstorm | Strong winds |
| Blouberg           |                            | ✓         |                       | ✓                |                    |                       |           |          |           |              |
| Collins Chabane    | ✓                          |           |                       |                  |                    |                       |           |          |           |              |
| Elias Motsoaledi   |                            |           | ✓                     |                  |                    |                       |           |          | ✓         |              |
| Ephraim Mogale     |                            |           | ✓                     |                  |                    |                       |           |          |           |              |
| Fetakgomo Tubatse  |                            |           | ✓                     |                  |                    |                       |           |          |           | ✓            |
| Greater Giyani     |                            | ✓         |                       |                  |                    |                       |           |          |           |              |
| Greater Letaba     |                            |           |                       |                  |                    |                       |           |          |           |              |
| Greater Tzaneen    |                            |           | ✓                     |                  |                    |                       |           |          | ✓         | ✓            |
| Lepelle-Nkumpi     | ✓                          | ✓         | ✓                     |                  | ✓                  | ✓                     |           |          |           |              |
| Makhado            |                            |           | ✓                     |                  |                    |                       |           | ✓        | ✓         |              |
| Makhuduthamaga     |                            |           | ✓                     |                  |                    |                       |           |          |           |              |
| Maruleng           |                            |           | ✓                     |                  |                    |                       |           | ✓        | ✓         | ✓            |
| Molemole           |                            |           |                       |                  |                    |                       |           |          |           |              |
| Thulamela          |                            |           | ✓                     |                  |                    |                       |           | ✓        | ✓         |              |

Table S1 above provides more detailed results that are summarized in Figure 3 of the paper in section 3.2.

**Table S2.** Hydroclimatic hazards referred to by rural local municipalities in Limpopo Province

| Local Municipality | HYDROCLIMATIC HAZARD     |                             |        |                              |           |           |         |         |                       |           |              |       |
|--------------------|--------------------------|-----------------------------|--------|------------------------------|-----------|-----------|---------|---------|-----------------------|-----------|--------------|-------|
|                    | Hot temperature/Heatwave | Heavy/severe/intense storms | Floods | Erratic/fluctuating rainfall | Hailstorm | Hurricane | Cyclone | Drought | Increasing dry spells | Veldfires | Strong winds | TOTAL |
| Blouberg           | ✓                        |                             |        | ✓                            |           |           |         | ✓       |                       |           |              | 3     |
| Collins Chabane    | ✓                        |                             | ✓      |                              |           |           |         | ✓       |                       |           |              | 3     |
| Elias Motsoaledi   |                          | ✓                           | ✓      |                              | ✓         |           |         | ✓       |                       | ✓         |              | 5     |
| Ephraim Mogale     |                          | ✓                           | ✓      |                              |           |           |         | ✓       |                       | ✓         |              | 4     |
| Fetakgomo Tubatse  |                          | ✓                           |        |                              |           |           |         | ✓       |                       |           | ✓            | 3     |
| Greater Giyani     | ✓                        |                             | ✓      |                              |           |           |         | ✓       |                       |           |              | 3     |
| Greater Letaba     |                          | ✓                           | ✓      | ✓                            |           |           |         | ✓       |                       | ✓         |              | 5     |
| Greater Tzaneen    |                          | ✓                           | ✓      |                              | ✓         |           |         |         |                       | ✓         | ✓            | 5     |
| Lepelle-Nkumpi     | ✓                        | ✓                           | ✓      |                              |           |           |         | ✓       | ✓                     | ✓         |              | 6     |
| Makhado            |                          | ✓                           | ✓      |                              | ✓         | ✓         | ✓       | ✓       |                       | ✓         |              | 7     |
| Makhuduthamaga     |                          | ✓                           |        |                              |           |           |         |         |                       | ✓         |              | 2     |
| Maruleng           |                          | ✓                           | ✓      |                              | ✓         | ✓         | ✓       | ✓       |                       | ✓         | ✓            | 8     |
| Molemole           |                          |                             |        |                              |           |           |         |         |                       | ✓         |              | 1     |
| Thulamela          |                          | ✓                           | ✓      |                              | ✓         | ✓         | ✓       | ✓       |                       | ✓         |              | 7     |
| TOTAL              | 4                        | 10                          | 10     | 2                            | 5         | 3         | 3       | 11      | 1                     | 10        | 3            |       |

Table S2 above provides more detail on the hydroclimatic hazards that are presented in section 3.2

**Table S3.** Environmental vulnerabilities identified by rural local municipalities in Limpopo Province

| Local Municipality | ENVIRONMENTAL VULNERABILITIES |                     |                   |                   |               |                 |                  |           |          |             |             |              |                     |                 |       |
|--------------------|-------------------------------|---------------------|-------------------|-------------------|---------------|-----------------|------------------|-----------|----------|-------------|-------------|--------------|---------------------|-----------------|-------|
|                    | Air pollution                 | Alien plant species | Biodiversity loss | Bush encroachment | Deforestation | Desertification | Land degradation | Landslide | Mudslide | Overgrazing | Sand mining | Soil erosion | Stormwater drainage | Water pollution | TOTAL |
| Blouberg           |                               |                     |                   |                   | ✓             |                 | ✓                |           |          | ✓           |             |              | ✓                   |                 | 4     |
| Collins Chabane    | ✓                             |                     |                   | ✓                 | ✓             | ✓               | ✓                |           |          | ✓           |             | ✓            |                     |                 | 7     |
| Elias Motsoaledi   | ✓                             | ✓                   |                   |                   | ✓             | ✓               | ✓                |           | ✓        |             | ✓           | ✓            | ✓                   | ✓               | 10    |
| Ephraim Mogale     |                               |                     |                   |                   |               |                 | ✓                |           |          |             |             |              | ✓                   | ✓               | 3     |
| Fetakgomo Tubatse  | ✓                             |                     |                   |                   |               |                 | ✓                |           |          | ✓           |             | ✓            |                     |                 | 4     |
| Greater Giyani     | ✓                             |                     | ✓                 |                   | ✓             |                 | ✓                |           |          | ✓           |             | ✓            |                     | ✓               | 7     |
| Greater Letaba     |                               |                     |                   | ✓                 | ✓             |                 | ✓                |           |          |             |             | ✓            | ✓                   | ✓               | 6     |
| Greater Tzaneen    |                               |                     |                   |                   | ✓             |                 | ✓                |           |          | ✓           |             | ✓            |                     |                 | 4     |
| Lepelle-Nkumpi     | ✓                             | ✓                   | ✓                 |                   | ✓             |                 | ✓                |           |          | ✓           |             | ✓            |                     |                 | 7     |
| Makhado            | ✓                             |                     |                   |                   | ✓             | ✓               | ✓                | ✓         | ✓        |             |             | ✓            |                     |                 | 7     |
| Makhuduthamaga     | ✓                             |                     |                   |                   | ✓             |                 | ✓                |           |          | ✓           |             | ✓            |                     | ✓               | 6     |
| Maruleng           | ✓                             |                     |                   |                   | ✓             |                 | ✓                | ✓         | ✓        | ✓           |             | ✓            |                     | ✓               | 8     |
| Molemole           | ✓                             | ✓                   |                   |                   | ✓             |                 |                  |           |          | ✓           |             | ✓            |                     |                 | 5     |
| Thulamela          | ✓                             |                     |                   |                   | ✓             | ✓               | ✓                | ✓         | ✓        |             |             |              |                     |                 | 6     |
| <b>TOTAL</b>       | 10                            | 3                   | 2                 | 2                 | 12            | 4               | 13               | 3         | 4        | 9           | 1           | 11           | 4                   | 6               |       |

Table S3 above provides more detailed environmental vulnerabilities that are summarized in Figure 4 under section 3.2
